# Supplementary material for: Confluences and Land Cover As Agents of Change: Temporal Habitat Variability Modifies the Movement and Assemblage Change of Headwater Fishes
Source: Research Square preprint supplement (doi:10.21203/rs.3.rs-415082/v1), 2021-04-14
Supplement: Supplementary file 1 [file 5f486bc42194384de254c513.docx]

| Site | Year | Reach | | | Reach Category | Depth (cm) | | Current Velocity  (m·s⁻¹) | | Substrate Size | | % Woody Structure | Wetted Width (m) | Bankfull  Width (m) |
| --- | --- | --- | --- | --- | --- | --- | --- | --- | --- | --- | --- | --- | --- | --- |
| Garraway Creek | 2017 | | 1 | | MS Upstream | 35.02 ± 17.89 | | 0.13 ± 0.13 | | 1.88 ± 0.51 | | 0.44 ± 0.48 | 4.33 ± 1.02 | 5.67 ± 1.52 |
|  |  | | 2 | | Tributary | 33.47 ± 17.48 | | 0.08 ± 0.08 | | 2.11 ± 0.62 | | 0.46 ± 0.50 | 4.26 ±1.53 | 5.53 ± 1.70 |
|  |  | | 3 | | MS Downstream | 85.96 ± 33.47 | | 0.05 ± 0.09 | | 1.8 ± 0.50 | | 0.62 ± 0.48 | 6.57 ± 0.63 | 8.53 ± 0.63 |
|  |  | |  | |  |  | |  | |  | |  |  |  |
|  | 2018 | | 1 | | MS Upstream | 40.19 ± 18.12 | | 0.08 ± 0.04 | | 2.0 ± 0.0 | | 0.52 ± 0.50 | 4.46 ± 0.84 | 5.29 ± 1.20 |
|  |  | | 2 | | Tributary | 36.15 ± 18.52 | | 0.08 ± 0.08 | | 2.20 ± 0.63 | | 0.31 ± 0.47 | 4.75 ± 1.17 | 5.53 ± 1.56 |
|  |  | | 3 | | MS Downstream | 81.38 ± 32.19 | | 0.04 ± 0.04 | | 1.75 ± 0.43 | | 0.30 ± 0.46 | 6.5 ± 0.87 | 7.12 ± 0.86 |
|  |  | |  | |  |  | |  | |  | |  |  |  |
| Priest Creek | 2017 | | 1 | | MS Downstream | 18.78 ± 10.15 | | 0.26 ± 0.15 | | 2.56 ± 0.52 | | 0.18 ± 0.38 | 3.92 ± 1.31 | 6.70 ± 1.01 |
|  |  | | 2 | | MS Upstream | 18.08 ± 11.34 | | 0.23 ± 0.15 | | 2.63 ± 0.53 | | 0.27 ± 0.44 | 3.18 ± 1.33 | 7.33 ± 1.95 |
|  |  | | 3 | | Tributary | 15.85 ± 12.13 | | 0.09 ± 0.09 | | 2.9 ± 0.33 | | 0.24 ± 0.41 | 2.26 ± 0.82 | 4.91 ± 1.61 |
|  |  | |  | |  |  | |  | |  | |  |  |  |
|  | 2018 | | 1 | | MS Downstream | 18.12 ± 10.07 | | 0.21 ± 0.13 | | 2.61 ± 0.49 | | 0.16 ± 0.37 | 4.28 ± 1.34 | 7.83 ± 1.31 |
|  |  | | 2 | | MS Upstream | 20.60 ± 11.82 | | 0.20 ± 0.17 | | 2.71 ± 0.46 | | 0.38 ± 0.48 | 3.05 ± 1.12 | 8.31 ± 2.24 |
|  |  | | 3 | | Tributary | 14.8 ± 10.99 | | 0.46 ± 2.89 | | 2.81 ± 0.40 | | 0.33 ± 0.47 | 2.46 ± 1.04 | 4.13 ± 0.94 |
|  |  | |  | |  |  | |  | |  | |  |  |  |
| Mixon’s Creek | 2017 | | 1 | | MS Downstream | 17.73 ± 14.80 | | 0.10 ± 0.12 | | 2.39 ± 0.66 | | 0.05 ± 0.15 | 3.90 ± 1.75 | 7.43 ± 3.74 |
|  |  | | 2 | | Tributary | 14.53 ± 9.32 | | 0.03 ± 0.03 | | 2.03 ± 0.18 | | 0.0 ± 0.0 | 3.59 ± 1.05 | 6.43 ± 1.42 |
|  |  | | 3 | | MS Upstream | 14.36 ± 8.46 | | 0.14 ± 0.21 | | 2.43 ± 0.75 | | 0.02 ± 0.10 | 2.87 ± 1.56 | 5.85 ± 2.94 |
|  |  | |  | |  |  | |  | |  | |  |  |  |
|  | 2018 | | 1 | | MS Downstream | 16.29 ± 13.18 | | 0.09 ± 0.13 | | 2.63 ± 0.71 | | 0.05 ± 0.22 | 3.27 ± 1.50 | 8.33 ± 3.70 |
|  |  | | 2 | | Tributary | 12.51 ± 9.20 | | 0.05 ± 0.06 | | 2.46 ± 0.61 | | 0 ± 0 | 4.33 ± 1.05 | 6.36 ± 1.49 |
|  |  | | 3 | | MS Upstream | 14.36 ± 8.46 | | 0.06 ± 0.10 | | 2.46 ± 0.78 | | 0.04 ± 0.21 | 2.59 ± 1.26 | 7.01 ± 2.70 |
|  |  | |  | |  |  | |  | |  | |  |  |  |
| Sweetwater Creek | 2018 | | 1 | | MS Upstream | 34.83 ± 20.21 | | 0.20 ± 0.12 | | 2 ± 0 | | 0.68 ± 0.37 | 2.55 ± 0.87 | 3.17 ±1.0 |
|  |  | | 2 | | Tributary | 17.92 ± 8.83 | | 0.15 ± 0.09 | | 1.99 ± 0.09 | | 0.5 ± 0.45 | 1.83 ± 0.57 | 2.47 ± 0.61 |
|  |  | | 3 | MS Downstream | | 42.88 ± 22.16 | 0.13 ± 0.08 | | 1.97 ± 0.18 | | 0.53 ± 0.48 | | 2.96 ± 0.52 | 3.61 ± 0.89 |

Table S4. Means and standard deviations for six habitat variables within years for all reaches at four headwater confluences.
