# Supplementary material for: Confluences and Land Cover As Agents of Change: Temporal Habitat Variability Modifies the Movement and Assemblage Change of Headwater Fishes
Source: Research Square preprint supplement (doi:10.21203/rs.3.rs-415082/v1), 2021-04-14
Supplement: Supplementary file 2 [file 919a7cee597f0e98ca0e0f35.docx]

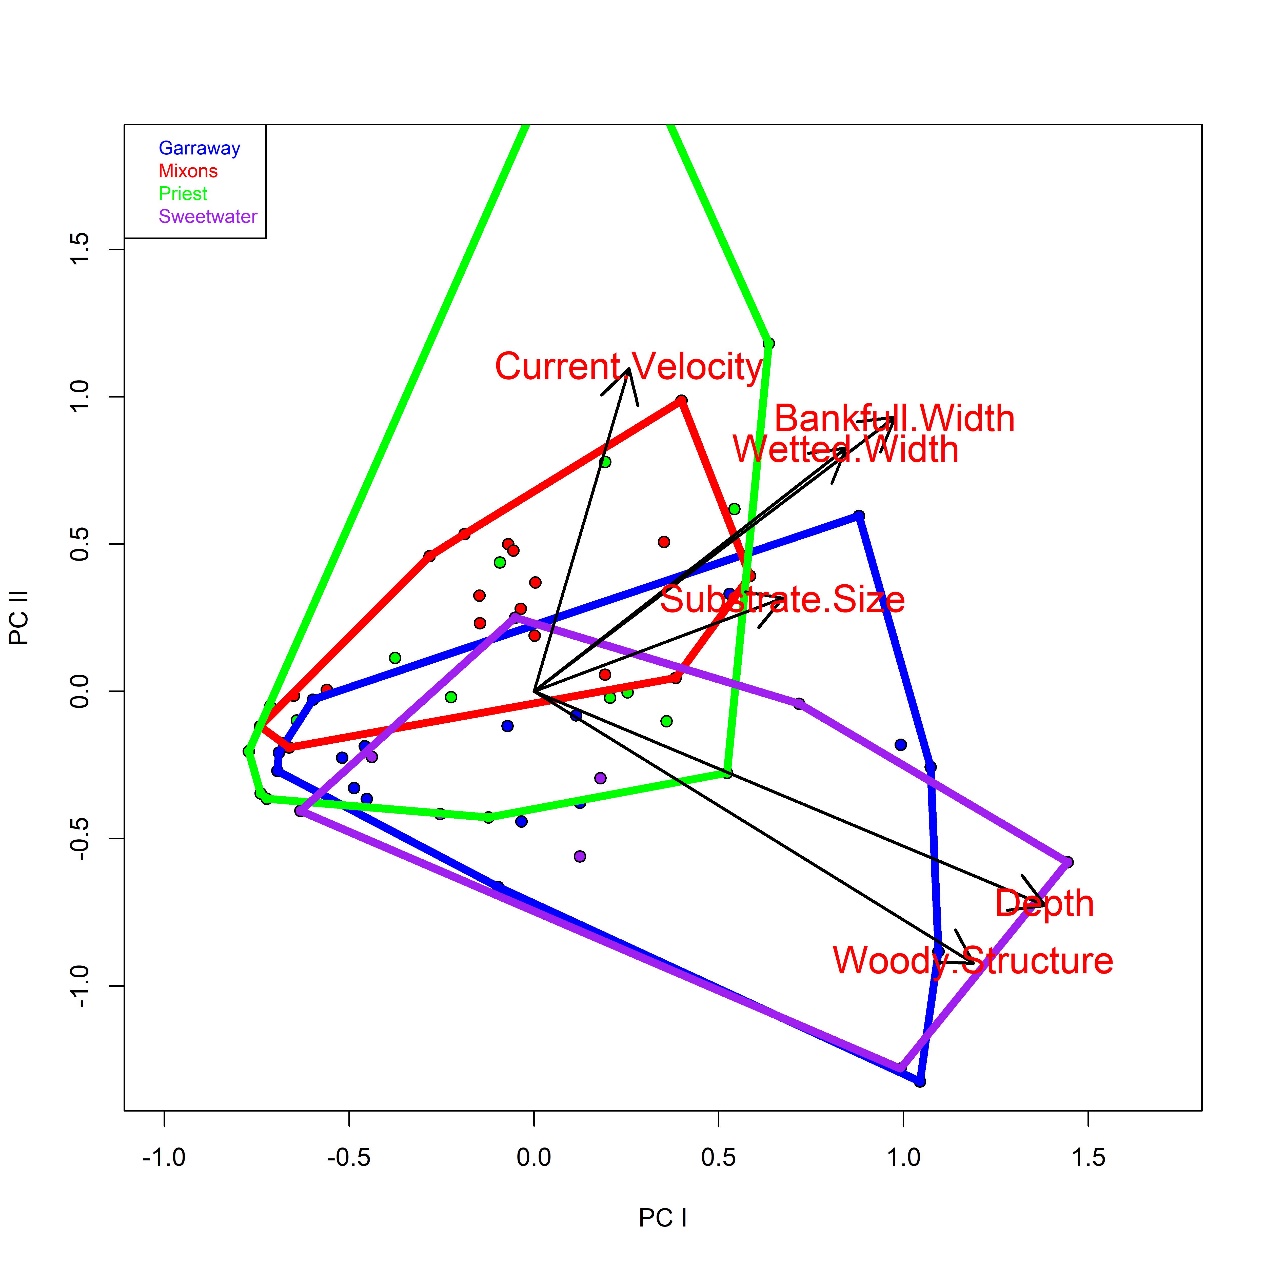


Figure S1. Principal component analysis (PCA) of in-stream habitat variable absolute mean differences for PC1 and PC2 axes. Arrows end at centroids for environmental variables.
